# Supplementary figures and images for: Targeting cancer-associated fibroblast-secreted WNT2 restores dendritic cell-mediated antitumour immunity
Source: HighWire-hosted journal article supplement (doi:10.1136/gutjnl-2020-322924), 2021-03-10

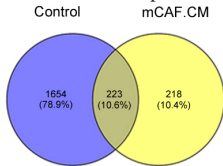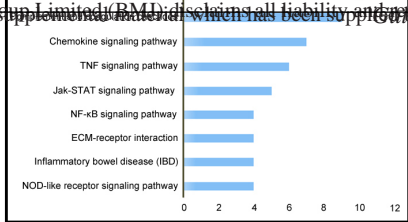

Huang et al Supplemental Figure 8

Supplement: gutjnl-2020-322924supp009_data_supplement.pdf [file gutjnl-2020-322924supp009_data_supplement.pdf]
